# Supplementary material
Source: Research Square preprint supplement (doi:10.21203/rs.3.rs-9114016/v1)
Supplement: Supplementary file 1 [file 6993dc1d7821e5f4c8570fc7.docx]

**Table 1.** The distribution and range of various physicochemical properties of TaSIZ1 sequences mined from thirteen pangenome species.

| **Gene** | **No. of genomes*** | **Gene Length (bp)** | **cDNA Length (bp)** | **CDS Length (bp)** | **Gene % GC content** | **Protein Length (aa)** | **GRAVY** | **Aliphatic Index** | **Instability Index** | **Molecular Weight (kDa)** | **Aromaticity** | **Isoelectric Point (pl)** |
| --- | --- | --- | --- | --- | --- | --- | --- | --- | --- | --- | --- | --- |
| *TaSIZ1-1A* | *13/13* | 14874-16412 | 3105-4826 | 2619-2625 | 41.12-42.15 | 872-874 | -0.61--0.60 | 70.76-71.22 | 45.69-46.19 | 96.91-97.02 | 0.07 | 4.97 |
| *TaSIZ1-1B* | *12/13* | 14559-16368 | 3001-4042 | 2622-2625 | 40.57-41.29 | 873-874 | -0.59--0.59 | 72.12-72.35 | 44.97-45.84 | 96.99-97.11 | 0.07 | 4.90 |
| *TaSIZ1-1D* | *13/13* | 15318-21517 | 3070-5037 | 2622-4512 | 40.82-47.00 | 873-930 | -0.6--0.58 | 69.55-73.11 | 45.00-48.70 | 96.91-103.32 | 0.07 | 4.92-5.06 |
| *TaSIZ1-3A* | *6/13* | 7520-7878 | 3057-3572 | 2787-2805 | 42.48-43.06 | 928-934 | -0.54--0.48 | 79.08-81.73 | 46.39-51.31 | 102.44-103.32 | 0.05 | 4.85-4.99 |
| *TaSIZ1-3B* | *12/13* | 6580-8015 | 2775-3705 | 2775-2793 | 42.13-42.98 | 924-930 | -0.53--0.52 | 78.47-79.01 | 45.93-46.46 | 102.26-103.04 | 0.05 | 4.87-4.93 |
| *TaSIZ1-3D* | *4/13* | 6490-7634 | 2787-3363 | 2787-2901 | 42.06-42.57 | 928-966 | -0.5--0.49 | 79.39-80.61 | 45.68-47.93 | 102.64-106.72 | 0.05 | 4.92-4.94 |
| *TaSIZ1-4A* | *13/13* | 8317-9057 | 2334-3074 | 2334-2334 | 40.54-41.55 | 777-777 | -0.55--0.55 | 73.87-74.00 | 38.93-39.17 | 85.16-85.20 | 0.06 | 5.16 |
| *TaSIZ1-4B* | *13/13* | 8764-12143 | 2334-4667 | 2334-3972 | 40.67-41.52 | 777-837 | -0.57--0.56 | 72.79-74.13 | 38.25-43.56 | 85.12-91.88 | 0.06 | 5.02-5.78 |
| *TaSIZ1-4D* | *12/13* | 8358-9442 | 2334-3021 | 2334-2517 | 40.63-41.50 | 777-838 | -0.58--0.56 | 73.28-73.87 | 38.57-43.42 | 85.26-91.99 | 0.06 | 5.20-5.84 |
| *TaSIZ1-5A* | *13/13* | 8258-9238 | 2379-3359 | 2379-2583 | 40.99-41.98 | 792-860 | -0.61--0.59 | 79.03-80.97 | 40.71-48.5 | 87.73-94.79 | 0.05 | 5.27-5.56 |
| *TaSIZ1-5B* | *13/13* | 8939-9504 | 2986-3154 | 2385-2661 | 40.59-41.96 | 794-886 | -0.63--0.46 | 74.28-80.54 | 41.88-62.01 | 87.97-97.16 | 0.05 | 5.15-6.60 |
| *TaSIZ1-5D* | *13/13* | 8852-10028 | 2904-3613 | 2355-2622 | 41.50-42.26 | 784-873 | -0.62--0.59 | 78.29-79.45 | 40.74-50.43 | 86.54-96.34 | 0.05 | 5.20-5.69 |
| *TaSIZ1-7A* | *12/13* | 8688-10327 | 2788-3319 | 2352-2739 | 38.65-40.71 | 783-912 | -0.47--0.44 | 72.45-74.06 | 62.29-64.13 | 85.01-98.89 | 0.05 | 6.36-7.02 |
| *TaSIZ1-7B* | *11/13* | 9003-9723 | 2941-3373 | 2385-2661 | 40.18-41.86 | 794-886 | -0.6--0.46 | 74.28-80.54 | 41.88-62.01 | 87.97-96.28 | 0.05 | 5.15-6.60 |
| *TaSIZ1-7D* | *12/13* | 8075-8782 | 2825-3222 | 2316- 2652 | 38.57-40.61 | 771-883 | -0.45--0.40 | 73.44-74.98 | 60.3-61.88 | 83.9-95.97 | 0.05 | 6.11-6.45 |

**Note**: *The number of genomes out of 13 pangenome species showing a particular gene. The single numerical value indicates no variation in the target parameters of a gene across the 13 target pangenome species.
