# Supplementary material
Source: Research Square preprint supplement (doi:10.21203/rs.3.rs-9114016/v1)
Supplement: Supplementary file 2 [file 8e42224c4d766fd85cc70801.xlsx]

## Sheet: Table S1
Supplementary Table S1. The genetic material used in the current investigation for the validation of TaSIZ1 genes in response to drought stress and leaf rust disease infection.
S. No.	Genotype	Pedigree	Reaction to Leaf rust	Response to Drought stress	Source
1	C-306	RGN/CSK3//2*C591/3/C217/N14// C281	Susceptible	Tolerant	Chaudhary Charan Singh Haryana Agricultural University Hissar
2	HD2888	STAMPALLI/C-306//DL-153-2/HW-2003	Resistant	Comparatively Sensitive	ICAR-IARI, New Delhi

## Sheet: Table S2
Supplementary Table 2. List of SIZ1 genes primers used for studying the expression of TaSIZ1 genes in wheat through qRT-PCR analysis
Genes	Primer requences	Forward/Reverse
TaSIZ1-1A	GCATTCACATGGGTTGTTTTGAT	F
TaSIZ1-1A	TGCGTGACCGCTGATTCA	R
TaSIZ1-1B	AGGAAGATCCTGGTGTCGGTACTA	F
TaSIZ1-1B	TCCGGTTGAGAATAGGGCATT	R
TaSIZ1-1D	CGGTGGTGATGATCCTTCTT	F
TaSIZ1-1D	CCTGTCTCATTTGCCCGTAT	R
TaSIZ1-3B	ATGTGGTCAAGTGCGACGAT	F
TaSIZ1-3B	GGTCTGCTCGGATTAGTCGG	R
TaSIZ1-3D	CATAACTTCCTGGTCTGCGC	F
TaSIZ1-3D	GCAGCCAAGGGTATAAGCAC	R

## Sheet: Table S3
Supplementary Table 3. The genomic features and physicochemical properties of TaSIZ1 genes in bread wheat pangenome species.
Gene stable ID	Gene Name	Gene start (bp)	Gene end (bp)	Gene Lenght (bp)	cDNA Length (bp)	CDS Length (bp)	Gene % GC content	Transcript count	Protein Length (aa)	GRAVY	Aliphatic Index	Instability Index	Stability	Molecular Weight	Aromaticity	Isoelectric Point	Charge at pH 7
Chinese Spring
TraesCS1A03G0162100	TaSIZ1-1A	51128004	51143624	15621	3432	2622	41.33	7	873	-0.61	70.76	46.06	Unstable	97000.8	0.07	4.97	-35.06
TraesCS1B03G0213800	TaSIZ1-1B	73835735	73851818	16327	3494	2625	40.82	8	874	-0.59	72.12	45.34	Unstable	97078	0.07	4.9	-37.15
TraesCS1D03G0150100	TaSIZ1-1D	51603428	51623843	21517	3189	2664	46.05	10	887	-0.58	70.51	48.7	Unstable	98712.9	0.07	5.01	-34.91
TraesCS3B03G1526800	TaSIZ1-3B	851653229	851660208	8015	3577	2778	42.17	3	925	-0.53	78.9	46.35	Unstable	102347	0.05	4.89	-39.2
TraesCS3D03G1200600	TaSIZ1-3D	619147028	619154652	7625	3363	2811	42.06	5	966	-0.5	80.1	47.48	Unstable	106724	0.05	4.94	-36.94
TraesCS4A03G0496400	TaSIZ1-4A	459363201	459372257	9057	3074	2334	41.36	3	777	-0.55	74	39.17	Stable	85158.6	0.06	5.16	-23.35
TraesCS4B03G0317200	TaSIZ1-4B	181393820	181403278	9459	3029	2334	41.38	2	777	-0.56	74.13	38.68	Stable	85123.5	0.06	5.16	-23.34
TraesCS4D03G0260100	TaSIZ1-4D	116527947	116536963	9017	2992	2334	41.38	3	777	-0.56	73.87	38.57	Stable	85255.7	0.06	5.2	-22.34
TraesCS5A03G0424800	TaSIZ1-5A	333111097	333120114	9018	3139	2379	41.75	1	792	-0.59	80.97	40.71	Unstable	87731.4	0.05	5.27	-26.71
TraesCS5B03G0419700	TaSIZ1-5B	285796570	285805648	9079	3126	2385	41.92	1	794	-0.6	80.54	41.88	Unstable	87969.5	0.05	5.15	-30.71
TraesCS5D03G0393000	TaSIZ1-5D	252734607	252743646	9040	3135	2367	41.98	1	788	-0.6	79.43	41.99	Unstable	87082.3	0.05	5.2	-28.69
TraesCS7A03G0299000	TaSIZ1-7A	84770477	84779459	8984	3084	2352	38.78	2	825	-0.46	73.61	62.29	Unstable	89637.2	0.05	6.49	-2.9
TraesCS7B03G0070400	TaSIZ1-7B	26720737	26730306	9570	3220	2661	40.6	3	886	-0.46	74.28	62.01	Unstable	96279.5	0.05	6.6	-2.71
TraesCS7D03G0280600	TaSIZ1-7D	79193441	79201515	8075	2825	2469	38.59	3	822	-0.4	74.59	60.34	Unstable	89864.6	0.06	6.39	-4.11
Alchemy
TraesCS1A02G065700	TaSIZ1-1A	33995497	34010736	15240	3432	2622	41.45	7	873	-0.61	70.76	46.06	Unstable	97000.8	0.07	4.97	-35.06
TraesCS1D02G066700	TaSIZ1-1D	34354271	34371837	17567	5037	4512	41.34	10	930	-0.59	69.55	48.23	Unstable	103324	0.07	4.92	-40.82
TraesCS3A02G538000	TaSIZ1-3A	615961241	615968917	7677	3494	2790	42.5	3	929	-0.48	81.73	46.65	Unstable	102578	0.05	4.85	-40.29
TraesCS3B02G603400	TaSIZ1-3B	729819594	729827562	7969	3573	2778	42.13	3	925	-0.52	79.01	45.93	Unstable	102289	0.05	4.9	-38.21
TraesCS3D02G543400	TaSIZ1-3D	475296507	475303999	7493	3233	2805	42.39	5	934	-0.49	79.91	45.78	Unstable	103280	0.05	4.92	-37.21
TraesCS4A02G182900	TaSIZ1-4A	391766070	391775126	9057	3074	2334	41.42	3	777	-0.55	74	39.17	Stable	85168.7	0.06	5.16	-23.35
TraesCS4B02G135700	TaSIZ1-4B	14567904	14580046	12143	4667	3972	41.34	2	802	-0.57	72.79	38.25	Stable	87890.4	0.06	5.02	-28.33
TraesCS5A02G155100	TaSIZ1-5A	275555361	275564378	9018	3139	2379	41.75	1	792	-0.59	80.97	40.71	Unstable	87731.4	0.05	5.27	-26.71
TraesCS5B02G153300	TaSIZ1-5B	242818749	242827827	9079	3126	2385	41.92	1	794	-0.6	80.54	41.88	Unstable	87969.5	0.05	5.15	-30.71
TraesCS5D02G160100	TaSIZ1-5D	192293215	192302254	9040	3135	2367	41.98	1	788	-0.6	79.43	41.99	Unstable	87082.3	0.05	5.2	-28.69
TraesCS7A02G126400	TaSIZ1-7A	54830820	54841146	10327	3119	2388	38.81	2	795	-0.45	72.58	64.04	Unstable	86155.3	0.05	6.36	-4.16
TraesCS7B02G025700	TaSIZ1-7B	20488589	20498091	9503	3220	2661	40.49	3	886	-0.46	74.28	62.01	Unstable	96279.5	0.05	6.6	-2.71
Arinalfor
TraesARI1A03G00023480	TaSIZ1-1A	53900187	53915680	15494	3928	2622	41.54	6	873	-0.61	70.76	46.06	Unstable	97000.8	0.07	4.97	-35.06
TraesARI1B03G00216440	TaSIZ1-1B	65086326	65102094	15769	3356	2625	40.69	5	874	-0.59	72.12	45.34	Unstable	97078	0.07	4.9	-37.15
TraesARI1D03G00432230	TaSIZ1-1D	47205064	47224984	19921	3181	2622	46.51	1	873	-0.6	70.64	45.74	Unstable	96943.8	0.07	4.95	-35.15
TraesARI3B03G01827290	TaSIZ1-3B	887667008	887674844	7837	3705	2775	42.4	2	924	-0.53	78.98	46	Unstable	102260	0.05	4.89	-39.2
TraesARI4A03G02141290	TaSIZ1-4A	460130700	460139657	8958	2975	2334	41.24	1	777	-0.55	74	39.17	Stable	85168.7	0.06	5.16	-23.35
TraesARI4B03G02316660	TaSIZ1-4B	177886439	177895780	9342	2912	2334	41.38	1	777	-0.56	74.13	38.68	Stable	85123.5	0.06	5.16	-23.34
TraesARI4D03G02494530	TaSIZ1-4D	116659113	116668092	8980	2955	2334	41.39	1	777	-0.56	73.87	38.57	Stable	85255.7	0.06	5.2	-22.34
TraesARI5A03G02689590	TaSIZ1-5A	334029866	334038422	8557	2678	2379	41.3	1	792	-0.59	80.97	40.71	Unstable	87731.4	0.05	5.27	-26.71
TraesARI5B03G02965830	TaSIZ1-5B	456793009	456802502	9494	3144	2661	40.59	2	886	-0.46	74.28	62.01	Unstable	96279.5	0.05	6.6	-2.71
TraesARI5D03G03053280	TaSIZ1-5D	257960236	257969264	9029	3124	2367	41.92	1	788	-0.6	79.43	41.99	Unstable	87082.3	0.05	5.2	-28.69
TraesARI7A03G03814070	TaSIZ1-7A	92538571	92548026	9456	3290	2703	40.62	1	900	-0.47	73.79	63.32	Unstable	97651.1	0.05	6.81	-0.97
TraesARI7B03G04189200	TaSIZ1-7B	556838091	556847093	9003	3050	2385	41.7	1	794	-0.6	80.54	41.88	Unstable	87969.5	0.05	5.15	-30.71
TraesARI7D03G04387540	TaSIZ1-7D	78428246	78436728	8483	3051	2652	40.22	1	883	-0.45	74.98	61.76	Unstable	95965.2	0.05	6.45	-3.88
Jagger
TraesJAG1A03G00023100	TaSIZ1-1A	47382807	47399218	16412	3957	2622	41.52	4	873	-0.61	70.76	46.19	Unstable	97024.8	0.07	4.97	-35.06
TraesJAG1B03G00212900	TaSIZ1-1B	69974166	69990533	16368	3513	2625	40.85	5	874	-0.59	72.12	45.34	Unstable	97078	0.07	4.9	-37.15
TraesJAG1D03G00426450	TaSIZ1-1D	46310146	46325827	15682	3173	2685	40.82	2	894	-0.58	73.11	45	Unstable	99253.5	0.07	5.06	-32.89
TraesJAG3A03G01539690	TaSIZ1-3A	753750719	753758238	7520	3057	2802	42.54	2	933	-0.54	79.08	51.31	Unstable	103324	0.05	4.99	-34.84
TraesJAG4A03G02105060	TaSIZ1-4A	458079173	458088082	8910	2927	2334	41.28	1	777	-0.55	74	39.17	Stable	85158.6	0.06	5.16	-23.35
TraesJAG4B03G02279970	TaSIZ1-4B	179767556	179776905	9350	2920	2334	41.5	1	777	-0.56	74.13	38.68	Stable	85123.5	0.06	5.16	-23.34
TraesJAG4D03G02453300	TaSIZ1-4D	117208709	117217650	8942	2918	2334	41.41	1	777	-0.56	73.87	38.57	Stable	85255.7	0.06	5.2	-22.34
TraesJAG5A03G02648740	TaSIZ1-5A	335631836	335640390	8555	2676	2379	41.29	1	792	-0.59	80.97	40.71	Unstable	87731.4	0.05	5.27	-26.71
TraesJAG5B03G02867480	TaSIZ1-5B	282769104	282778102	8999	3046	2385	41.76	1	794	-0.6	80.54	41.88	Unstable	87969.5	0.05	5.15	-30.71
TraesJAG5D03G03097870	TaSIZ1-5D	254377143	254385997	8855	2950	2367	41.75	1	788	-0.6	79.43	41.99	Unstable	87082.3	0.05	5.2	-28.69
TraesJAG7A03G03825390	TaSIZ1-7A	78668122	78676809	8688	2788	2352	38.69	2	783	-0.46	72.45	62.95	Unstable	85005.9	0.05	6.36	-4.15
TraesJAG7B03G04034030	TaSIZ1-7B	25838200	25847838	9639	2941	2661	40.18	1	886	-0.46	74.28	62.01	Unstable	96279.5	0.05	6.6	-2.71
TraesJAG7D03G04295640	TaSIZ1-7D	78003351	78011461	8111	2826	2316	38.6	1	771	-0.45	73.45	61.88	Unstable	83903.7	0.05	6.11	-7.07
Julius
TraesJUL1A03G00024280	TaSIZ1-1A	48977259	48992132	14874	3328	2619	41.12	3	872	-0.61	70.84	45.69	Unstable	96913.7	0.07	4.97	-35.06
TraesJUL1B03G00210670	TaSIZ1-1B	68719187	68734809	15623	3312	2622	40.63	3	873	-0.59	72.2	44.97	Unstable	96990.9	0.07	4.9	-37.15
TraesJUL1D03G00429770	TaSIZ1-1D	48186257	48206191	19935	3320	2622	46.49	1	873	-0.6	70.64	45.74	Unstable	96943.8	0.07	4.95	-35.15
TraesJUL3B03G01807880	TaSIZ1-3B	848394300	848401269	6970	3165	2775	42.96	1	924	-0.53	78.98	46	Unstable	102260	0.05	4.89	-39.2
TraesJUL4A03G02123180	TaSIZ1-4A	462952196	462961095	8900	2917	2334	41.39	1	777	-0.55	74	39.17	Stable	85168.7	0.06	5.16	-23.35
TraesJUL4B03G02300640	TaSIZ1-4B	177361151	177370547	9397	2967	2334	41.45	3	777	-0.56	74.13	38.68	Stable	85123.5	0.06	5.16	-23.34
TraesJUL4D03G02474900	TaSIZ1-4D	116812555	116821524	8970	2945	2334	41.48	2	777	-0.56	73.87	38.57	Stable	85255.7	0.06	5.2	-22.34
TraesJUL5A03G02667720	TaSIZ1-5A	337676126	337685042	8917	3038	2379	41.72	1	792	-0.59	80.97	40.71	Unstable	87731.4	0.05	5.27	-26.71
TraesJUL5B03G02890450	TaSIZ1-5B	299879684	299888746	9063	3110	2385	41.85	1	794	-0.6	80.54	41.88	Unstable	87969.5	0.05	5.15	-30.71
TraesJUL5D03G03124800	TaSIZ1-5D	257221177	257230145	8969	3064	2367	41.86	1	788	-0.6	79.43	41.99	Unstable	87082.3	0.05	5.2	-28.69
TraesJUL7A03G03874440	TaSIZ1-7A	72917752	72926939	9188	3289	2388	38.99	1	795	-0.46	72.58	64.13	Unstable	86208.3	0.05	6.47	-3.15
TraesJUL7B03G04089080	TaSIZ1-7B	25337736	25347279	9544	3194	2661	40.51	1	886	-0.46	74.28	62.01	Unstable	96279.5	0.05	6.6	-2.71
TraesJUL7D03G04356040	TaSIZ1-7D	80063831	80071979	8149	2864	2316	38.59	3	771	-0.45	73.45	61.88	Unstable	83903.7	0.05	6.11	-7.07
Kariega
TraesKAR1A01G0038840	TaSIZ1-1A	59163531	59179801	16271	4826	2619	42.15	1	872	-0.61	70.84	45.69	Unstable	96913.7	0.07	4.97	-35.06
TraesKAR1B01G0055070	TaSIZ1-1B	77691413	77707662	16250	4042	2625	41.11	2	874	-0.59	72.12	45.34	Unstable	97078	0.07	4.9	-37.15
TraesKAR1D01G0040170	TaSIZ1-1D	54501528	54517537	16010	4191	2625	41.41	2	874	-0.6	70.78	46.35	Unstable	96997.8	0.07	4.97	-34.15
TraesKAR3A01G0476710	TaSIZ1-3A	759282410	759290164	7755	3572	2790	42.48	2	929	-0.48	81.73	46.65	Unstable	102578	0.05	4.85	-40.29
TraesKAR3B01G0565830	TaSIZ1-3B	864344451	864351030	6580	2775	2775	42.26	1	924	-0.53	78.98	46	Unstable	102260	0.05	4.89	-39.2
TraesKAR3D01G0446900	TaSIZ1-3D	632745956	632752445	6490	2787	2787	42.57	1	928	-0.5	79.39	45.68	Unstable	102642	0.05	4.92	-37.21
TraesKAR4A01G0281000	TaSIZ1-4A	461154413	461162729	8317	2334	2334	40.54	1	777	-0.55	74	39.17	Stable	85168.7	0.06	5.16	-23.35
TraesKAR4B01G0117290	TaSIZ1-4B	182026681	182035444	8764	2334	2334	40.67	1	777	-0.56	74.13	38.68	Stable	85123.5	0.06	5.16	-23.34
TraesKAR4D01G0086740	TaSIZ1-4D	119197266	119205623	8358	2334	2334	40.63	1	777	-0.56	73.87	38.57	Stable	85255.7	0.06	5.2	-22.34
TraesKAR5A01G0201700	TaSIZ1-5A	337471128	337479385	8258	2379	2379	40.99	1	792	-0.59	80.97	40.71	Unstable	87731.4	0.05	5.27	-26.71
TraesKAR5B01G0185870	TaSIZ1-5B	302046690	302056017	9328	3150	2385	41.96	3	794	-0.6	80.54	41.88	Unstable	87969.5	0.05	5.15	-30.71
TraesKAR5D01G0181000	TaSIZ1-5D	265653031	265662096	9066	3161	2367	41.97	2	788	-0.6	79.43	41.99	Unstable	87082.3	0.05	5.2	-28.69
Lancer
TraesLAC1A03G00024460	TaSIZ1-1A	50468615	50484450	15836	3941	2622	41.82	3	873	-0.61	70.76	46.19	Unstable	97024.8	0.07	4.97	-35.06
TraesLAC1B03G00216970	TaSIZ1-1B	69642864	69658095	15232	3050	2625	40.89	7	874	-0.59	72.12	45.34	Unstable	97078	0.07	4.9	-37.15
TraesLAC1D03G00430140	TaSIZ1-1D	47920852	47936645	15794	3730	2625	41.14	3	874	-0.6	70.78	46.35	Unstable	96997.8	0.07	4.97	-34.15
TraesLAC3A03G01472360	TaSIZ1-3A	741368767	741376399	7633	3443	2787	42.74	3	928	-0.49	81.4	46.39	Unstable	102445	0.05	4.87	-39.29
TraesLAC3B03G01732150	TaSIZ1-3B	829845592	829853514	7923	3485	2778	42.21	2	925	-0.53	78.9	46.35	Unstable	102347	0.05	4.89	-39.2
TraesLAC4A03G02057680	TaSIZ1-4A	455990176	455999094	8919	2936	2334	41.36	1	777	-0.55	74	39.17	Stable	85168.7	0.06	5.16	-23.35
TraesLAC4B03G02233980	TaSIZ1-4B	176893687	176903076	9390	2959	2334	41.49	1	777	-0.56	74.13	38.68	Stable	85123.5	0.06	5.16	-23.34
TraesLAC4D03G02409150	TaSIZ1-4D	116096413	116105406	8994	2969	2334	41.44	1	777	-0.56	73.87	38.57	Stable	85255.7	0.06	5.2	-22.34
TraesLAC5A03G02601240	TaSIZ1-5A	333177092	333186012	8921	3042	2379	41.71	1	792	-0.59	80.97	40.71	Unstable	87731.4	0.05	5.27	-26.71
TraesLAC5B03G02822660	TaSIZ1-5B	282289340	282298355	9016	3063	2385	41.77	1	794	-0.6	80.54	41.88	Unstable	87969.5	0.05	5.15	-30.71
TraesLAC5D03G03055480	TaSIZ1-5D	252861535	252871052	9518	3613	2367	42.26	1	788	-0.6	79.43	41.99	Unstable	87082.3	0.05	5.2	-28.69
TraesLAC7A03G03795910	TaSIZ1-7A	81046866	81056159	9294	3250	2703	40.37	1	900	-0.47	73.79	63.32	Unstable	97651.1	0.05	6.81	-0.97
TraesLAC7B03G04003770	TaSIZ1-7B	25319649	25329051	9403	3053	2661	40.64	1	886	-0.46	74.28	62.01	Unstable	96279.5	0.05	6.6	-2.71
TraesLAC7D03G04259360	TaSIZ1-7D	78352428	78361081	8654	3222	2652	40.57	1	883	-0.45	74.98	61.76	Unstable	95965.2	0.05	6.45	-3.88
Landmark
TraesLDM1A03G00023910	TaSIZ1-1A	49123445	49139529	16085	3921	2622	41.5	4	873	-0.61	70.76	46.19	Unstable	97024.8	0.07	4.97	-35.06
TraesLDM1B03G00213370	TaSIZ1-1B	67672134	67687787	15654	3738	2625	41.15	6	874	-0.59	72.12	45.34	Unstable	97078	0.07	4.9	-37.15
TraesLDM1D03G00428610	TaSIZ1-1D	49613643	49634067	20425	3174	2625	46.47	1	874	-0.6	70.56	46.12	Unstable	97030.8	0.07	4.95	-35.15
TraesLDM3A03G01531910	TaSIZ1-3A	752555771	752563648	7878	3253	2805	43.06	4	934	-0.48	81.3	46.63	Unstable	103271	0.05	4.89	-38.3
TraesLDM3B03G01791550	TaSIZ1-3B	841387766	841395602	7837	3399	2778	42.24	2	925	-0.53	78.9	46.35	Unstable	102347	0.05	4.89	-39.2
TraesLDM4A03G02102620	TaSIZ1-4A	462963936	462972798	8863	2880	2334	41.24	1	777	-0.55	74	39.17	Stable	85168.7	0.06	5.16	-23.35
TraesLDM4B03G02280770	TaSIZ1-4B	180658892	180668226	9335	2905	2334	41.52	1	777	-0.56	74.13	38.68	Stable	85123.5	0.06	5.16	-23.34
TraesLDM4D03G02458140	TaSIZ1-4D	116703017	116711997	8981	2956	2334	41.49	1	777	-0.56	73.87	38.57	Stable	85255.7	0.06	5.2	-22.34
TraesLDM5A03G02650920	TaSIZ1-5A	337167426	337175982	8557	2678	2379	41.3	1	792	-0.59	80.97	40.71	Unstable	87731.4	0.05	5.27	-26.71
TraesLDM5B03G02871670	TaSIZ1-5B	286977196	286986191	8996	3043	2385	41.76	1	794	-0.6	80.54	41.88	Unstable	87969.5	0.05	5.15	-30.71
TraesLDM5D03G03104370	TaSIZ1-5D	252032235	252041272	9038	3133	2367	41.93	1	788	-0.6	79.43	41.99	Unstable	87082.3	0.05	5.2	-28.69
TraesLDM7A03G03850030	TaSIZ1-7A	81433967	81443491	9525	3107	2388	38.83	2	795	-0.46	72.58	64.13	Unstable	86208.3	0.05	6.47	-3.15
TraesLDM7B03G04054560	TaSIZ1-7B	25338153	25347875	9723	3373	2661	40.65	1	886	-0.46	74.28	62.01	Unstable	96279.5	0.05	6.6	-2.71
TraesLDM7D03G04318590	TaSIZ1-7D	78451947	78460728	8782	3035	2316	38.67	2	771	-0.45	73.45	61.88	Unstable	83903.7	0.05	6.11	-7.07
Mace
TraesMAC1A03G00023240	TaSIZ1-1A	49249543	49265123	15581	4045	2622	41.83	3	873	-0.61	70.76	46.06	Unstable	97000.8	0.07	4.97	-35.06
TraesMAC1B03G00215300	TaSIZ1-1B	73004891	73019449	14559	3001	2622	40.9	1	873	-0.59	72.2	44.97	Unstable	96990.9	0.07	4.9	-37.15
TraesMAC1D03G00426350	TaSIZ1-1D	47638017	47653470	15454	3449	2622	40.97	1	873	-0.6	70.86	45.98	Unstable	96910.7	0.07	4.97	-34.15
TraesMAC3B03G01796150	TaSIZ1-3B	847680817	847688609	7793	3234	2793	42.42	3	930	-0.53	78.47	46.33	Unstable	103040	0.05	4.93	-37.21
TraesMAC4A03G02103340	TaSIZ1-4A	453678930	453687848	8919	2936	2334	41.37	1	777	-0.55	74	39.17	Stable	85168.7	0.06	5.16	-23.35
TraesMAC4B03G02280070	TaSIZ1-4B	176563970	176573357	9388	2958	2334	41.38	1	777	-0.56	74.13	38.68	Stable	85123.5	0.06	5.16	-23.34
TraesMAC4D03G02454150	TaSIZ1-4D	116186782	116195732	8951	2926	2334	41.46	1	777	-0.56	73.87	38.57	Stable	85255.7	0.06	5.2	-22.34
TraesMAC5A03G02646110	TaSIZ1-5A	333254249	333263114	8866	2987	2379	41.73	1	792	-0.59	80.97	40.71	Unstable	87731.4	0.05	5.27	-26.71
TraesMAC5B03G02868740	TaSIZ1-5B	282564986	282574018	9033	3080	2385	41.82	1	794	-0.6	80.54	41.88	Unstable	87969.5	0.05	5.15	-30.71
TraesMAC5D03G03098490	TaSIZ1-5D	252318792	252328800	10009	3453	2367	42.11	1	788	-0.6	79.43	41.99	Unstable	87082.3	0.05	5.2	-28.69
TraesMAC7A03G03844730	TaSIZ1-7A	80549616	80558978	9363	3319	2703	40.59	1	900	-0.47	73.79	63.32	Unstable	97651.1	0.05	6.81	-0.97
TraesMAC7B03G04046940	TaSIZ1-7B	25159130	25168669	9540	3190	2661	40.56	2	886	-0.46	74.28	62.01	Unstable	96279.5	0.05	6.6	-2.71
TraesMAC7D03G04304900	TaSIZ1-7D	79738464	79747070	8607	3175	2652	40.57	1	883	-0.45	74.98	61.76	Unstable	95965.2	0.05	6.45	-3.88
Mattis
TraesSYM1A03G00023880	TaSIZ1-1A	53904164	53919640	15477	3972	2622	41.6	4	873	-0.61	70.76	46.06	Unstable	97000.8	0.07	4.97	-35.06
TraesSYM1B03G00217950	TaSIZ1-1B	66725379	66741576	16198	3960	2625	41.26	3	874	-0.59	72.12	45.34	Unstable	97078	0.07	4.9	-37.15
TraesSYM1D03G00433100	TaSIZ1-1D	46843461	46863785	20325	3578	2625	46.52	1	874	-0.6	70.56	46.53	Unstable	97046.9	0.07	4.95	-35.16
TraesSYM3A03G01555510	TaSIZ1-3A	748962691	748970290	7600	3431	2790	42.74	3	929	-0.48	81.73	46.65	Unstable	102578	0.05	4.85	-40.29
TraesSYM3B03G01820560	TaSIZ1-3B	835791897	835799726	7830	3279	2778	42.39	3	925	-0.53	78.9	46.35	Unstable	102347	0.05	4.89	-39.2
TraesSYM4A03G02131170	TaSIZ1-4A	456479681	456488647	8967	2984	2334	41.34	1	777	-0.55	74	39.17	Stable	85168.7	0.06	5.16	-23.35
TraesSYM4B03G02307380	TaSIZ1-4B	177222161	177231545	9385	2955	2334	41.36	1	777	-0.56	74.13	38.68	Stable	85123.5	0.06	5.16	-23.34
TraesSYM4D03G02483340	TaSIZ1-4D	116419795	116428717	8923	2898	2334	41.4	1	777	-0.56	73.87	38.57	Stable	85255.7	0.06	5.2	-22.34
TraesSYM5A03G02676780	TaSIZ1-5A	331750269	331759194	8926	3047	2379	41.71	1	792	-0.59	80.97	40.71	Unstable	87731.4	0.05	5.27	-26.71
TraesSYM5B03G02951150	TaSIZ1-5B	442329950	442339453	9504	3154	2661	40.61	1	886	-0.46	74.28	62.01	Unstable	96279.5	0.05	6.6	-2.71
TraesSYM5D03G03039490	TaSIZ1-5D	251895645	251904496	8852	2947	2367	41.85	1	788	-0.6	79.43	41.99	Unstable	87082.3	0.05	5.2	-28.69
TraesSYM7A03G03794280	TaSIZ1-7A	79972949	79982247	9299	3256	2739	40.65	1	912	-0.47	73.88	63.83	Unstable	98893.5	0.05	7.02	0.12
TraesSYM7B03G04151850	TaSIZ1-7B	418432922	418442033	9112	3159	2385	41.86	1	794	-0.6	80.54	41.88	Unstable	87969.5	0.05	5.15	-30.71
TraesSYM7D03G04365330	TaSIZ1-7D	76538911	76547362	8452	3020	2652	40.58	1	883	-0.45	74.98	61.76	Unstable	95965.2	0.05	6.45	-3.88
Noroin61
TraesNOR1A03G00023220	TaSIZ1-1A	49787026	49802602	15577	4032	2622	41.79	5	873	-0.61	70.76	46.06	Unstable	97000.8	0.07	4.97	-35.06
TraesNOR1B03G00216300	TaSIZ1-1B	70657625	70673174	15550	3344	2622	40.57	2	873	-0.59	72.2	44.97	Unstable	96990.9	0.07	4.9	-37.15
TraesNOR1D03G00433580	TaSIZ1-1D	48776911	48792228	15318	3401	2622	40.88	2	873	-0.6	70.86	45.98	Unstable	96910.7	0.07	4.97	-34.15
TraesNOR3B03G01817900	TaSIZ1-3B	842453945	842461786	7842	3404	2778	42.3	2	925	-0.53	78.9	46.35	Unstable	102347	0.05	4.89	-39.2
TraesNOR4A03G02125630	TaSIZ1-4A	454200236	454209185	8950	2967	2334	41.43	1	777	-0.55	74	39.17	Stable	85158.6	0.06	5.16	-23.35
TraesNOR4B03G02297730	TaSIZ1-4B	178063915	178073262	9348	2918	2334	41.42	1	777	-0.56	74.13	38.68	Stable	85123.5	0.06	5.16	-23.34
TraesNOR4D03G02473590	TaSIZ1-4D	116588151	116597082	8932	2907	2334	41.37	2	777	-0.56	73.87	38.57	Stable	85255.7	0.06	5.2	-22.34
TraesNOR5A03G02669210	TaSIZ1-5A	336378217	336387321	9105	3226	2379	41.98	1	792	-0.59	80.97	40.71	Unstable	87731.4	0.05	5.27	-26.71
TraesNOR5B03G02895970	TaSIZ1-5B	292191223	292200292	9070	3117	2385	41.89	1	794	-0.6	80.54	41.88	Unstable	87969.5	0.05	5.15	-30.71
TraesNOR5D03G03129420	TaSIZ1-5D	251612339	251621325	8987	3082	2367	41.97	1	788	-0.6	79.43	41.99	Unstable	87082.3	0.05	5.2	-28.69
TraesNOR7A03G03886430	TaSIZ1-7A	79940083	79949278	9196	3153	2739	40.71	1	912	-0.47	73.88	63.83	Unstable	98893.5	0.05	7.02	0.12
TraesNOR7B03G04095970	TaSIZ1-7B	26410288	26419933	9646	3296	2661	40.62	3	886	-0.46	74.28	62.01	Unstable	96279.5	0.05	6.6	-2.71
TraesNOR7D03G04361150	TaSIZ1-7D	77217475	77226103	8629	3197	2652	40.61	2	883	-0.45	74.98	61.76	Unstable	95965.2	0.05	6.45	-3.88
Renan
TraesRN1A0100180600	TaSIZ1-1A	50194110	50209338	15229	3435	2625	41.47	7	874	-0.6	71.22	46.03	Unstable	97023.9	0.07	4.97	-35.06
TraesRN1B0100200200	TaSIZ1-1B	70944602	70959773	15172	3494	2625	40.95	8	874	-0.59	72.35	45.84	Unstable	97106	0.07	4.9	-37.15
TraesRN1D0100155700	TaSIZ1-1D	48776793	48797129	20337	3530	2625	46.6	10	874	-0.6	70.89	46.25	Unstable	97042.9	0.07	4.95	-35.15
TraesRN3B0101535500	TaSIZ1-3B	854137901	854144857	6957	3178	2778	42.98	3	925	-0.53	78.9	46.46	Unstable	102405	0.05	4.87	-40.2
TraesRN3D0101255000	TaSIZ1-3D	622816807	622824440	7634	3363	2901	42.1	5	966	-0.5	80.61	47.93	Unstable	106720	0.05	4.94	-36.94
TraesRN4A0100504500	TaSIZ1-4A	458152597	458161646	9050	3067	2334	41.55	3	777	-0.55	73.87	38.93	Stable	85200.6	0.06	5.16	-23.34
TraesRN4A0100504600	TaSIZ1-4A	458152671	458161647	8977	2994	2514	41.42	2	837	-0.57	73.25	43.56	Unstable	91884.4	0.06	5.78	-11.72
TraesRN4B0100331100	TaSIZ1-4B	179169266	179178707	9442	3021	2517	41.34	2	838	-0.58	73.28	43.42	Unstable	91993.4	0.06	5.84	-10.92
TraesRN5A0100436900	TaSIZ1-5A	333442913	333451932	9020	3139	2583	41.85	1	860	-0.61	79.03	48.5	Unstable	94785.2	0.05	5.56	-20.14
TraesRN5B0100422500	TaSIZ1-5B	292484248	292493308	9061	3126	2643	41.92	1	880	-0.63	75.68	50.03	Unstable	97161.6	0.05	5.62	-18.42
TraesRN5D0100412100	TaSIZ1-5D	250982274	250991270	8997	3150	2622	41.76	1	873	-0.62	78.29	50.43	Unstable	96344.8	0.05	5.69	-17.31
TraesRN7A0100265300	TaSIZ1-7A	83301334	83310343	9010	3119	2514	38.88	2	837	-0.44	74.06	63.04	Unstable	90806.6	0.05	6.8	-0.9
TraesRN7D0100289700	TaSIZ1-7D	78927451	78935526	8076	2828	2472	38.57	3	823	-0.42	73.44	60.3	Unstable	89844.4	0.06	6.38	-4.85
Stanely
TraesSTA1A03G00022080	TaSIZ1-1A	44581355	44597041	15687	3105	2622	41.38	5	873	-0.61	70.76	46.06	Unstable	97000.8	0.07	4.97	-35.06
TraesSTA1B03G00211980	TaSIZ1-1B	72008555	72023220	14666	3058	2625	41.29	2	874	-0.59	72.12	45.34	Unstable	97078	0.07	4.9	-37.15
TraesSTA1D03G00426060	TaSIZ1-1D	49352065	49372212	20148	3070	2622	47	1	873	-0.6	70.64	45.74	Unstable	96943.8	0.07	4.95	-35.15
TraesSTA3B03G01785420	TaSIZ1-3B	855909417	855917264	7848	3410	2778	42.21	3	925	-0.53	78.9	46.35	Unstable	102347	0.05	4.89	-39.2
TraesSTA4A03G02100440	TaSIZ1-4A	465413122	465422023	8902	2919	2334	41.4	1	777	-0.55	74	39.17	Stable	85168.7	0.06	5.16	-23.35
TraesSTA4B03G02274140	TaSIZ1-4B	180469134	180478520	9387	2954	2334	41.42	1	777	-0.56	74.13	38.68	Stable	85123.5	0.06	5.16	-23.34
TraesSTA4D03G02451190	TaSIZ1-4D	117734607	117743577	8971	2947	2334	41.5	1	777	-0.56	73.87	38.57	Stable	85255.7	0.06	5.2	-22.34
TraesSTA5A03G02638680	TaSIZ1-5A	338502826	338512063	9238	3359	2379	41.95	1	792	-0.59	80.97	40.71	Unstable	87731.4	0.05	5.27	-26.71
TraesSTA5B03G02861140	TaSIZ1-5B	293527202	293536140	8939	2986	2385	41.79	1	794	-0.6	80.54	41.88	Unstable	87969.5	0.05	5.15	-30.71
TraesSTA5D03G03090580	TaSIZ1-5D	253546736	253556763	10028	2904	2355	41.5	1	784	-0.59	79.45	40.74	Unstable	86542.8	0.05	5.22	-27.7
TraesSTA7A03G03838120	TaSIZ1-7A	81592251	81600989	8739	2839	2352	38.65	1	783	-0.46	72.45	62.95	Unstable	85005.9	0.05	6.36	-4.15
TraesSTA7B03G04046920	TaSIZ1-7B	25954725	25964087	9363	3013	2661	40.48	1	886	-0.46	74.28	62.01	Unstable	96279.5	0.05	6.6	-2.71
TraesSTA7D03G04306040	TaSIZ1-7D	79401253	79409401	8149	2864	2316	38.59	2	771	-0.45	73.45	61.88	Unstable	83903.7	0.05	6.11	-7.07

## Sheet: Table S4
Supplementary Table 4. The genomic features and physicochemical properties of SIZ1 genes in barley, rice, maize and sorghum.
Gene stable ID	Gene Name	Localization	Chromosome	Gene start (bp)	Gene end (bp)	Gene Lenght (bp)	cDNA Length (bp)	CDS Length (bp)	Gene % GC content	Transcript count	Protein Length (aa)	GRAVY	Aliphatic Index	Instability Index	Stability	Molecular Weight (kDa)	Aromaticity	Isoelectric Point	Charge at pH 7
HORVU.MOREX.r3.1HG0014340	HvSIZ1-1H	Nucleus	1H	37459186	37480530	21344	3632	2625	44.01	2	875	-0.57	71.5	43.31	Unstable	97.017	0.06	5.01	-32.18
HORVU.MOREX.r3.3HG0330990	HvSIZ1-3H	Nucleus	3H	620855829	620865110	9281	3386	2775	42.38	1	813	-0.56	75.39	45.13	Unstable	89.546	0.05	4.87	-36.21
HORVU.MOREX.r3.4HG0355130	HvSIZ1-4H	Nucleus	4H	135497928	135505531	7603	2815	2337	39.61	1	872	-0.41	76.86	56.1	Unstable	94.8569	0.06	6.24	-5.95
HORVU.MOREX.r3.5HG0466170	HvSIZ1-5H	Nucleus	5H	335148818	335157190	8372	2615	2385	40.65	1	888	-0.53	76.01	37.4	Stable	98.2968	0.07	5.17	-30.66
HORVU.MOREX.r3.7HG0655510	HvSIZ1-7H	Nucleus	7H	47006522	47015264	8742	2939	2646	40.03	1	826	-0.49	76.83	40.91	Unstable	90.0258	0.05	5.15	-29.82
Os05t0125000	OsSIZ1a	Nucleus	5	1426941	1438465	11524	3371	2628	39.52	1	890	-0.55	72.15	37.83	Stable	98.5548	0.07	5.11	-32.72
Os03t0719100	OsSIZ1b	Nucleus	3	29126803	29134828	8026	3157	2442	39.28	1	864	-0.48	75.42	54.47	Unstable	94.0951	0.05	8.19	4.4
Os06t0164000	OsSIZ1c	Nucleus	6	3250548	3261364	10816	3045	2619	40.58	1	874	-0.58	71.68	45.26	Unstable	97.0369	0.07	4.94	-36.06
Zm00001eb163160	ZmSIZ1a	Nucleus	3	235027288	235041890	14602	3145	2481	43.3	2	778	-0.54	74.14	37.45	Stable	85.2427	0.06	5.09	-26.26
Zm00001eb265410	ZmSIZ1b	Nucleus	6	35283172	35331023	8027	4403	2673	47.36	4	794	-0.57	78.83	40.74	Unstable	87.3139	0.05	5.27	-25.81
Zm00001eb355110	ZmSIZ1c	Nucleus	8	135174288	135186740	12452	3949	2667	41.34	1	924	-0.54	78.56	42.81	Unstable	102.375	0.05	5	-37.77
Zm00001eb375680	ZmSIZ1d	Nucleus	9	18285645	18309002	23357	3058	2595	48.3	2	881	-0.43	75.62	62.04	Unstable	95.9284	0.06	6.79	-1.05
SORBI_3005G002300	SbSIZ1a	Nucleus	5	166658	173490	6832	4719	1395	42.92	3	245	-0.35	84.73	45.64	Unstable	27.1868	0.03	4.83	-13.15
SORBI_3008G002300	SbSIZ1b	Nucleus	8	200214	209419	9205	2478	2478	41.93	2	859	-0.48	74.3	55.62	Unstable	93.6976	0.05	7.96	3.22
SORBI_3009G026500	SbSIZ1c	Nucleus	9	2348224	2358729	10505	3208	2613	40.76	2	870	-0.61	70.77	40.5	Unstable	96.4214	0.07	5.22	-27.82
SORBI_3010G051400	SbSIZ1d	Nucleus	10	3980081	3990381	10300	3289	2580	39.81	4	825	-0.53	75.49	40.62	Unstable	90.2111	0.05	5.04	-31.13

## Sheet: Table S5
Supplementary Table 5. Gene ontology enrichment of TaSIZ1 genes.
Function	Enrichment FDR	Number of Genes	Pathway Genes	Fold Enrichment	GO Term	Pathway	URL	Genes
Biological Function	1.1e-36	12	69	1319.13	GO:0016925	Protein sumoylation	https://amigo.geneontology.org/amigo/term/GO:0016925	TaSIZ1-1A, TaSIZ1-1B, TaSIZ1-1D, TaSIZ1-3B, TaSIZ1-4A,TaSIZ1-4B,TaSIZ1-4D,TaSIZ1-5A,TaSIZ1-5B,TaSIZ1-5D,TaSIZ1-7B,TaSIZ1-7D
	2.3e-31	12	192	474.062	GO:0018205	Peptidyl-lysine modification	https://amigo.geneontology.org/amigo/term/GO:0018205	TaSIZ1-1A, TaSIZ1-1B, TaSIZ1-1D, TaSIZ1-3B, TaSIZ1-4A,TaSIZ1-4B,TaSIZ1-4D,TaSIZ1-5A,TaSIZ1-5B,TaSIZ1-5D,TaSIZ1-7B,TaSIZ1-7D
	1.3e-24	12	710	128.197	GO:0018193	Peptidyl-amino acid modification	https://amigo.geneontology.org/amigo/term/GO:0018193	TaSIZ1-1A, TaSIZ1-1B, TaSIZ1-1D, TaSIZ1-3B, TaSIZ1-4A,TaSIZ1-4B,TaSIZ1-4D,TaSIZ1-5A,TaSIZ1-5B,TaSIZ1-5D,TaSIZ1-7B,TaSIZ1-7D
	3.8e-18	12	2508	36.2919	GO:0032446	Protein modification by small protein conjugation	https://amigo.geneontology.org/amigo/term/GO:0032446	TaSIZ1-1A, TaSIZ1-1B, TaSIZ1-1D, TaSIZ1-3B, TaSIZ1-4A,TaSIZ1-4B,TaSIZ1-4D,TaSIZ1-5A,TaSIZ1-5B,TaSIZ1-5D,TaSIZ1-7B,TaSIZ1-7D
	1.4e-17	12	2884	31.5603	GO:0043687	Post-translational protein modification	https://amigo.geneontology.org/amigo/term/GO:0043687	TaSIZ1-1A, TaSIZ1-1B, TaSIZ1-1D, TaSIZ1-3B, TaSIZ1-4A,TaSIZ1-4B,TaSIZ1-4D,TaSIZ1-5A,TaSIZ1-5B,TaSIZ1-5D,TaSIZ1-7B,TaSIZ1-7D
	1.4e-17	12	2867	31.7475	GO:0070647	Protein modification by small protein conjugation or removal	https://amigo.geneontology.org/amigo/term/GO:0070647	TaSIZ1-1A, TaSIZ1-1B, TaSIZ1-1D, TaSIZ1-3B, TaSIZ1-4A,TaSIZ1-4B,TaSIZ1-4D,TaSIZ1-5A,TaSIZ1-5B,TaSIZ1-5D,TaSIZ1-7B,TaSIZ1-7D
Molecular Function	8.9e-39	12	47	1936.6	GO:0061665	Sumo ligase activity	https://amigo.geneontology.org/amigo/term/GO:0061665	TaSIZ1-1A, TaSIZ1-1B, TaSIZ1-1D, TaSIZ1-3B, TaSIZ1-4A,TaSIZ1-4B,TaSIZ1-4D,TaSIZ1-5A,TaSIZ1-5B,TaSIZ1-5D,TaSIZ1-7B,TaSIZ1-7D
	3.7e-38	12	55	1654.91	GO:0019789	Sumo transferase activity	https://amigo.geneontology.org/amigo/term/GO:0019789	TaSIZ1-1A, TaSIZ1-1B, TaSIZ1-1D, TaSIZ1-3B, TaSIZ1-4A,TaSIZ1-4B,TaSIZ1-4D,TaSIZ1-5A,TaSIZ1-5B,TaSIZ1-5D,TaSIZ1-7B,TaSIZ1-7D
	1.1e-23	14	2278	46.6155	GO:0008270	Zinc ion binding	https://amigo.geneontology.org/amigo/term/GO:0008270	TaSIZ1-1A, TaSIZ1-1B, TaSIZ1-1D, TaSIZ1-3B, TaSIZ1-3D,TaSIZ1-4A,TaSIZ1-4B,TaSIZ1-4D,TaSIZ1-5A,TaSIZ1-5B,TaSIZ1-5D,TaSIZ1-7A,TaSIZ1-7B,TaSIZ1-7D
	1.4e-22	12	1047	86.9341	GO:0061659	Ubiquitin-like protein ligase activity	https://amigo.geneontology.org/amigo/term/GO:0061659	TaSIZ1-1A, TaSIZ1-1B, TaSIZ1-1D, TaSIZ1-3B, TaSIZ1-4A,TaSIZ1-4B,TaSIZ1-4D,TaSIZ1-5A,TaSIZ1-5B,TaSIZ1-5D,TaSIZ1-7B,TaSIZ1-7D
	4.6e-20	12	1753	51.9224	GO:0016755	Aminoacyltransferase activity	https://amigo.geneontology.org/amigo/term/GO:0016755	TaSIZ1-1A, TaSIZ1-1B, TaSIZ1-1D, TaSIZ1-3B, TaSIZ1-4A,TaSIZ1-4B,TaSIZ1-4D,TaSIZ1-5A,TaSIZ1-5B,TaSIZ1-5D,TaSIZ1-7B,TaSIZ1-7D
	4.6e-20	12	1737	52.4007	GO:0019787	Ubiquitin-like protein transferase activity	https://amigo.geneontology.org/amigo/term/GO:0019787	TaSIZ1-1A, TaSIZ1-1B, TaSIZ1-1D, TaSIZ1-3B, TaSIZ1-4A,TaSIZ1-4B,TaSIZ1-4D,TaSIZ1-5A,TaSIZ1-5B,TaSIZ1-5D,TaSIZ1-7B,TaSIZ1-7D
	1.2e-19	14	4692	22.6321	GO:0046914	Transition metal ion binding	https://amigo.geneontology.org/amigo/term/GO:0046914	TaSIZ1-1A, TaSIZ1-1B, TaSIZ1-1D, TaSIZ1-3B, TaSIZ1-4A,TaSIZ1-4B,TaSIZ1-4D,TaSIZ1-5A,TaSIZ1-5B,TaSIZ1-5D,TaSIZ1-7B,TaSIZ1-7D
	1.9e-16	12	3593	25.3326	GO:0016746	Acyltransferase activity	https://amigo.geneontology.org/amigo/term/GO:0016746	TaSIZ1-1A, TaSIZ1-1B, TaSIZ1-1D, TaSIZ1-3B, TaSIZ1-4A,TaSIZ1-4B,TaSIZ1-4D,TaSIZ1-5A,TaSIZ1-5B,TaSIZ1-5D,TaSIZ1-7B,TaSIZ1-7D

## Sheet: Table S6
Table 3.		Supplementary Table 6. Subcellular localisation of TaSIZ1 proteins in bread wheat cultivar Chinese Spring.
Protein_Name	Molecular Function	Gene	Localizations	Signals	Nucleus
TaSIZ1-1A	SUMO transferase activity, SUMO ligase activity, Zinc ion binding	TaSIZ1-1A	Nucleus	Nuclear localization signal	0.9521
TaSIZ1-1B	SUMO transferase activity, SUMO ligase activity, Zinc ion binding	TaSIZ1-1B	Nucleus	Nuclear localization signal	0.9499
TaSIZ1-1D	SUMO transferase activity, SUMO ligase activity, Zinc ion binding	TaSIZ1-1D	Nucleus	Nuclear localization signal	0.9525
TaSIZ1-3B	SUMO transferase activity, SUMO ligase activity, Zinc ion binding	TaSIZ1-3B	Nucleus	Nuclear localization signal	0.9403
TaSIZ1-3D	SUMO transferase activity, SUMO ligase activity, Zinc ion binding	TaSIZ1-3D	Nucleus	Nuclear localization signal	0.9445
TaSIZ1-4A	SUMO transferase activity, SUMO ligase activity, Zinc ion binding	TaSIZ1-4A	Nucleus	Nuclear localization signal	0.9598
TaSIZ1-4B	SUMO transferase activity, SUMO ligase activity, Zinc ion binding	TaSIZ1-4B	Nucleus	Nuclear localization signal	0.9435
TaSIZ1-4D	SUMO transferase activity, SUMO ligase activity, Zinc ion binding	TaSIZ1-4D	Nucleus	Nuclear localization signal	0.9372
TaSIZ1-5A	SUMO transferase activity, SUMO ligase activity, Zinc ion binding	TaSIZ1-5A	Nucleus	Nuclear localization signal	0.9623
TaSIZ1-5B	SUMO transferase activity, SUMO ligase activity, Zinc ion binding	TaSIZ1-5B	Nucleus	Nuclear localization signal	0.9568
TaSIZ1-5D	SUMO transferase activity, SUMO ligase activity, Zinc ion binding	TaSIZ1-5D	Nucleus	Nuclear localization signal	0.9548
TaSIZ1-7A	SUMO transferase activity, SUMO ligase activity, Zinc ion binding	TaSIZ1-7A	Nucleus	Nuclear localization signal	0.8967
TaSIZ1-7B	SUMO transferase activity, SUMO ligase activity, Zinc ion binding	TaSIZ1-7B	Nucleus	Nuclear localization signal	0.8913
TaSIZ1-7D	SUMO transferase activity, SUMO ligase activity, Zinc ion binding	TaSIZ1-7D	Nucleus	Nuclear localization signal	0.8977

## Sheet: Table S7
Supplementary Table S7. The percent identity matrix among the SIZ1 protein sequences of wheat, barley, rice, maize and sorghum. The highlighted values in colour correspond to each clade and show a percentage identity of more than 50%.
	ZmSIZ1b	SbSIZ1d	HvSIZ1-5H	TaSIZ1-5A	TaSIZ1-5B	TaSIZ1-5D	OsSIZ1b	HvSIZ1-4H	TaSIZ1-4A	TaSIZ1-4B	TaSIZ1-4D	HvSIZ1-3H	TaSIZ1-3B	TaSIZ1-3D	ZmSIZ1c	ZmSIZ1a	SbSIZ1c	OsSIZ1a	HvSIZ1-1H	TaSIZ1-1A	TaSIZ1-1B	TaSIZ1-1D	SbSIZ1a	HvSIZ1-7H	TaSIZ1-7B	TaSIZ1-7A	TaSIZ1-7D	OsSIZ1c	ZmSIZ1d	SbSIZ1b
ZmSIZ1b	100	85.54	62.91	62.94	63.04	62.61	61.79	62.91	62.9	69.32	68.93	44.25	44.44	44.67	43.54	43.8	44.27	46.05	44.81	44.99	44.55	44.55	14.42	17.51	18.17	17.79	17.79	18.72	18.56	18.23
SbSIZ1d	85.54	100	63.51	63.15	63.38	62.96	62.72	63.48	63.2	69.35	68.96	42.76	42.68	42.92	43.41	43.93	44.27	45.22	43.71	43.77	43.32	43.32	15.81	17.87	18.53	18.1	18.1	18.85	19.1	18.45
HvSIZ1-5H	62.91	63.51	100	92.29	93.19	92.38	66.92	67.72	68.3	72.14	72.14	46.14	46.49	45.95	43.16	43.16	44.61	44.5	44.35	44.55	44.49	44.49	16.82	17.02	18.04	18.43	18.23	19.12	18.06	18.21
TaSIZ1-5A	62.94	63.15	92.29	100	95.71	95.42	67.22	68.16	68.87	72.47	72.47	46.28	46.77	46.22	43.82	43.82	45.54	45.16	44.88	45.07	44.88	44.88	16.82	17.08	17.6	18.27	18.08	18.7	18.28	18.27
TaSIZ1-5B	63.04	63.38	93.19	95.71	100	96.32	66.92	68.47	69.05	72.33	72.33	45.86	46.21	45.8	43.43	43.43	45.15	44.64	44.35	44.55	44.35	44.35	16.82	16.86	17.54	18.04	17.85	19.12	18.39	18.37
TaSIZ1-5D	62.61	62.96	92.38	95.42	96.32	100	66.8	67.94	68.65	71.56	71.56	46.54	46.9	46.34	43.11	43.24	44.84	44.86	44.31	44.5	44.31	44.31	16.82	17.33	18.03	18.41	18.41	19.12	18.54	18.69
OsSIZ1b	61.79	62.72	66.92	67.22	66.92	66.8	100	66.67	67.06	71.62	71.43	45.1	45.86	45.33	45.86	45.99	46.9	47.17	47.29	47.49	47.03	47.16	17.29	17.72	17.57	17.5	17.69	18.61	18.48	18.63
HvSIZ1-4H	62.91	63.48	67.72	68.16	68.47	67.94	66.67	100	93.55	89.12	89.31	46.72	47.51	46.95	43.91	44.87	45.66	46.04	46.16	46.36	46.44	46.44	17.29	16.56	17.58	17.9	17.9	18.99	18.52	19.01
TaSIZ1-4A	62.9	63.2	68.3	68.87	69.05	68.65	67.06	93.55	100	91.98	92.56	46.92	47.43	46.86	44.51	44.92	46.26	46.64	46.63	46.83	46.77	47.04	17.76	16.64	17.32	17.81	17.81	19.24	19.44	19.93
TaSIZ1-4B	69.32	69.35	72.14	72.47	72.33	71.56	71.62	89.12	91.98	100	99.05	55.39	55.51	54.64	53.35	55.12	55.14	55.03	54.12	54.12	53.92	53.92	18.1	17.85	19.24	21.05	21.05	21.46	21.6	21.71
TaSIZ1-4D	68.93	68.96	72.14	72.47	72.33	71.56	71.43	89.31	92.56	99.05	100	55.19	55.3	54.43	52.95	54.72	54.74	54.83	53.92	53.92	53.73	53.73	18.1	17.36	18.73	20.12	20.12	21.46	21.12	21.22
HvSIZ1-3H	44.25	42.76	46.14	46.28	45.86	46.54	45.1	46.72	46.92	55.39	55.19	100	91.41	91.53	57.02	57.48	59.29	59.72	58.73	58.17	58.86	58.48	13.15	17.5	16.32	16.69	16.86	19.44	18.67	18.51
TaSIZ1-3B	44.44	42.68	46.49	46.77	46.21	46.9	45.86	47.51	47.43	55.51	55.3	91.41	100	96.54	57.09	57.63	59.18	59.62	58.56	57.94	58.63	58.3	12.68	18.33	17.31	18.14	18.33	19.53	19.22	19.06
TaSIZ1-3D	44.67	42.92	45.95	46.22	45.8	46.34	45.33	46.95	46.86	54.64	54.43	91.53	96.54	100	56.56	57.34	58.5	59.32	58.39	57.77	58.46	58.13	13.15	18.6	17.6	18.4	18.6	19.79	19.64	19.49
ZmSIZ1c	43.54	43.41	43.16	43.82	43.43	43.11	45.86	43.91	44.51	53.35	52.95	57.02	57.09	56.56	100	90.98	92.3	75.87	73.84	73.58	73.84	73.96	12.68	17.13	16.95	18.24	17.93	19.27	17.58	18.15
ZmSIZ1a	43.8	43.93	43.16	43.82	43.43	43.24	45.99	44.87	44.92	55.12	54.72	57.48	57.63	57.34	90.98	100	93.79	77.25	75.12	75.32	75.35	75.46	12.68	16.74	16.25	17.46	17.46	19.5	17.24	17.69
SbSIZ1c	44.27	44.27	44.61	45.54	45.15	44.84	46.9	45.66	46.26	55.14	54.74	59.29	59.18	58.5	92.3	93.79	100	78.37	76.34	75.96	76.34	76.46	12.68	17	16.83	17.76	17.76	19.91	17.49	18.25
OsSIZ1a	46.05	45.22	44.5	45.16	44.64	44.86	47.17	46.04	46.64	55.03	54.83	59.72	59.62	59.32	75.87	77.25	78.37	100	81.18	81.27	80.6	80.95	13.68	16.64	17.25	17.35	17.17	18.94	17.59	18.2
HvSIZ1-1H	44.81	43.71	44.35	44.88	44.35	44.31	47.29	46.16	46.63	54.12	53.92	58.73	58.56	58.39	73.84	75.12	76.34	81.18	100	98.05	97.25	97.03	15.09	16.51	16.32	16.84	16.67	18.97	18.18	18.8
TaSIZ1-1A	44.99	43.77	44.55	45.07	44.55	44.5	47.49	46.36	46.83	54.12	53.92	58.17	57.94	57.77	73.58	75.32	75.96	81.27	98.05	100	97.82	97.71	15.09	16.56	16.38	16.87	16.7	19.47	18.24	18.85
TaSIZ1-1B	44.55	43.32	44.49	44.88	44.35	44.31	47.03	46.44	46.77	53.92	53.73	58.86	58.63	58.46	73.84	75.35	76.34	80.6	97.25	97.82	100	98.4	15.09	16.69	16.51	17.02	16.84	19.44	18.06	18.83
TaSIZ1-1D	44.55	43.32	44.49	44.88	44.35	44.31	47.16	46.44	47.04	53.92	53.73	58.48	58.3	58.13	73.96	75.46	76.46	80.95	97.03	97.71	98.4	100	15.09	16.51	16.32	16.67	16.49	19.26	18.18	18.95
SbSIZ1a	14.42	15.81	16.82	16.82	16.82	16.82	17.29	17.29	17.76	18.1	18.1	13.15	12.68	13.15	12.68	12.68	12.68	13.68	15.09	15.09	15.09	15.09	100	20.28	21.74	22.07	22.54	23.58	20.83	19.81
HvSIZ1-7H	17.51	17.87	17.02	17.08	16.86	17.33	17.72	16.56	16.64	17.85	17.36	17.5	18.33	18.6	17.13	16.74	17	16.64	16.51	16.56	16.69	16.51	20.28	100	90.41	92.41	92.45	62.06	58.09	58.65
TaSIZ1-7B	18.17	18.53	18.04	17.6	17.54	18.03	17.57	17.58	17.32	19.24	18.73	16.32	17.31	17.6	16.95	16.25	16.83	17.25	16.32	16.38	16.51	16.32	21.74	90.41	100	96.12	96.48	62.28	58.47	59.05
TaSIZ1-7A	17.79	18.1	18.43	18.27	18.04	18.41	17.5	17.9	17.81	21.05	20.12	16.69	18.14	18.4	18.24	17.46	17.76	17.35	16.84	16.87	17.02	16.67	22.07	92.41	96.12	100	97.4	63.14	59.75	60.34
TaSIZ1-7D	17.79	18.1	18.23	18.08	17.85	18.41	17.69	17.9	17.81	21.05	20.12	16.86	18.33	18.6	17.93	17.46	17.76	17.17	16.67	16.7	16.84	16.49	22.54	92.45	96.48	97.4	100	63.42	59.89	60.2
OsSIZ1c	18.72	18.85	19.12	18.7	19.12	19.12	18.61	18.99	19.24	21.46	21.46	19.44	19.53	19.79	19.27	19.5	19.91	18.94	18.97	19.47	19.44	19.26	23.58	62.06	62.28	63.14	63.42	100	61.57	62.78
ZmSIZ1d	18.56	19.1	18.06	18.28	18.39	18.54	18.48	18.52	19.44	21.6	21.12	18.67	19.22	19.64	17.58	17.24	17.49	17.59	18.18	18.24	18.06	18.18	20.83	58.09	58.47	59.75	59.89	61.57	100	89.14
SbSIZ1b	18.23	18.45	18.21	18.27	18.37	18.69	18.63	19.01	19.93	21.71	21.22	18.51	19.06	19.49	18.15	17.69	18.25	18.2	18.8	18.85	18.83	18.95	19.81	58.65	59.05	60.34	60.2	62.78	89.14	100

## Sheet: Table S8
Supplementary Table S8. The TaSIZ1 paralogs, duplication types, and estimates of non-synonymous (Ka) and synonymous (Ks) substitution rates, and their ratios (Ka/Ks). Ka and Ks were calculated from coding-sequence alignments for each gene pair (Gene_1 vs Gene_2).
Gene_1	Gene_2	Ka	Ks	Ka/Ks	Duplication Type
TaSIZ1-4B	TaSIZ1-4D	0.005596	0.0342699	0.163292	Segmental
TaSIZ1-5B	TaSIZ1-5D	0.0143387	0.034533	0.415217	WGD
TaSIZ1-5A	TaSIZ1-5D	0.0196714	0.0395145	0.497828	WGD
TaSIZ1-4A	TaSIZ1-4D	0.00447033	0.0422039	0.105922	WGD
TaSIZ1-5A	TaSIZ1-5B	0.0192521	0.0423257	0.454856	WGD
TaSIZ1-1B	TaSIZ1-1D	0.0126722	0.0463434	0.27344	Dispered
TaSIZ1-3D	TaSIZ1-7D	0.923686	0.0463434	0.27344	Dispered
TaSIZ1-7B	TaSIZ1-7D	0.032141	0.068024	0.472495	WGD
TaSIZ1-7A	TaSIZ1-7B	0.0203617	0.0716389	0.284227	WGD
TaSIZ1-3B	TaSIZ1-3D	0.0154436	0.0756944	0.204026	WGD
TaSIZ1-4A	TaSIZ1-4B	0.00784138	0.0756944	0.204026	WGD
TaSIZ1-7A	TaSIZ1-7D	0.024375	0.0757445	0.321805	WGD
TaSIZ1-1A	TaSIZ1-1B	0.00942434	0.0785147	0.120033	WGD
TaSIZ1-1A	TaSIZ1-1D	0.0152005	0.0891202	0.170562	WGD
TaSIZ1-4D	TaSIZ1-5D	0.164609	0.454715	0.362004	Segmental
TaSIZ1-4D	TaSIZ1-5B	0.160777	0.457421	0.351485	Segmental
TaSIZ1-4B	TaSIZ1-5A	0.163864	0.460755	0.355642	Segmental
TaSIZ1-4A	TaSIZ1-5B	0.159377	0.461718	0.345182	Segmental
TaSIZ1-4A	TaSIZ1-5D	0.163198	0.462538	0.352831	Segmental
TaSIZ1-4B	TaSIZ1-5D	0.16439	0.462782	0.355221	Segmental
TaSIZ1-4D	TaSIZ1-5A	0.162666	0.463339	0.351073	Segmental
TaSIZ1-4A	TaSIZ1-5A	0.162672	0.464084	0.350522	WGD
TaSIZ1-4B	TaSIZ1-5B	0.160207	0.467339	0.342806	Segmental
TaSIZ1-1A	TaSIZ1-3D	0.283318	1.05128	0.269498	WGD

## Sheet: Table S9
Supplementary Table S9. The orthologs of wheat SIZ1 genes with rice, barley, maize and sorghum and synonymous (Ks) and non-synonymous (Ka) substitutions between TaSIZ1 orthologs and their SIZ1 counterparts (Note- Ka: Nonsynonymous substitution rate, Ks: Synonymous substitution rate, Ka/Ks: Selective strength)
Gene_1	Gene_2	Ka	Ks	Ka/Ks
TaSIZ1-1D	HvSIZ1-1H	0.0187089	0.0986657	0.189619
TaSIZ1-1B	HvSIZ1-1H	0.0119089	0.0879141	0.135461
TaSIZ1-1A	HvSIZ1-1H	0.00842601	0.0842047	0.100066
TaSIZ1-3D	HvSIZ1-3H	0.0382202	0.174316	0.219258
TaSIZ1-5D	HvSIZ1-5H	0.034092	0.126207	0.270129
TaSIZ1-5A	HvSIZ1-5H	0.0374962	0.122944	0.304987
TaSIZ1-5B	HvSIZ1-5H	0.0310136	0.119101	0.260397
TaSIZ1-4A	HvSIZ1-4H	0.0278007	0.093328	0.297881
TaSIZ1-7B	HvSIZ1-7H	0.0449988	0.102663	0.438315
TaSIZ1-7D	HvSIZ1-7H	0.0542193	0.117398	0.461842
TaSIZ1-7A	HvSIZ1-7H	0.0416683	0.125151	0.332944
TaSIZ1-1D	ZmSIZ1a	0.146906	0.687361	0.213725
TaSIZ1-1B	ZmSIZ1a	0.138612	0.640113	0.216543
TaSIZ1-1A	ZmSIZ1a	0.140027	0.652748	0.21452
TaSIZ1-3D	ZmSIZ1a	0.29375	1.1415	0.257336
TaSIZ1-1D	ZmSIZ1c	0.145181	0.659617	0.220099
TaSIZ1-1B	ZmSIZ1c	0.139047	0.635237	0.21889
TaSIZ1-1A	ZmSIZ1c	0.139729	0.617211	0.226388
TaSIZ1-3D	ZmSIZ1c	0.278668	1.08836	0.256043
TaSIZ1-5D	ZmSIZ1b	0.237328	0.739659	0.320861
TaSIZ1-5A	ZmSIZ1b	0.232515	0.733355	0.317057
TaSIZ1-5B	ZmSIZ1b	0.234455	0.779761	0.300676
TaSIZ1-4A	ZmSIZ1b	0.233368	0.671385	0.347593
TaSIZ1-7B	ZmSIZ1d	0.273751	0.654107	0.418511
TaSIZ1-7D	ZmSIZ1d	0.29034	0.693395	0.418722
TaSIZ1-7A	ZmSIZ1d	0.278888	0.687068	0.40591
TaSIZ1-1D	OsSIZ1a	0.108747	0.420253	0.258766
TaSIZ1-1B	OsSIZ1a	0.106483	0.403123	0.264146
TaSIZ1-1A	OsSIZ1a	0.104323	0.412835	0.252699
TaSIZ1-3D	OsSIZ1a	0.261686	1.16682	0.224274
TaSIZ1-5D	OsSIZ1b	0.198419	0.590401	0.336075
TaSIZ1-5A	OsSIZ1b	0.19511	0.598269	0.326123
TaSIZ1-5B	OsSIZ1b	0.197817	0.616321	0.320964
TaSIZ1-4A	OsSIZ1b	0.185354	0.554639	0.334188
TaSIZ1-7B	OsSIZ1c	0.242775	0.620456	0.391285
TaSIZ1-7D	OsSIZ1c	0.241088	0.643187	0.374834
TaSIZ1-7A	OsSIZ1c	0.23398	0.680638	0.343766
TaSIZ1-1A	SbSIZ1c	0.127841	0.5991	0.213389
TaSIZ1-3D	SbSIZ1c	0.287341	1.07604	0.267036
TaSIZ1-5D	SbSIZ1d	0.892243	4.30195	0.207405
TaSIZ1-5A	SbSIZ1d	0.944997	3.39945	0.272986
TaSIZ1-5B	SbSIZ1d	0.937881	2.79984	0.334977
TaSIZ1-4A	SbSIZ1d	0.928003	3.39945	0.272986
TaSIZ1-7B	SbSIZ1b	0.925046	2.61467	0.35379
TaSIZ1-7D	SbSIZ1b	0.893815	2.28203	0.391676
TaSIZ1-7A	SbSIZ1b	0.922003	2.58941	0.356066

## Sheet: Table S10
Supplementary Table S10. The syntenic blocks showing TaSIZ1 genes sharing collinearity with their counterparts from barley, maize, sorghum and rice.
Block	Chromosome1	Protein ID 1	Gene 1	Chromosome 2	Protein ID 2	Gene 2
Wheat-Barley
3- 11:	chr1A	TraesCS1A03G0162100.2	TaSIZ1-1A	Ch1	HORVU.MOREX.r3.1HG0014340.1	HvSIZ1-1H
89- 13:	chr1B	TraesCS1B03G0213800.6	TaSIZ1-1A	Ch1	HORVU.MOREX.r3.1HG0014340.1	HvSIZ1-1H
170- 12:	chr1D	TraesCS1D03G0150100.8	TaSIZ1-1D	Ch1	HORVU.MOREX.r3.1HG0014340.1	HvSIZ1-1H
698- 3:	chr3D	TraesCS3D03G1200600.2	TaSIZ1-3D	Ch3	HORVU.MOREX.r3.3HG0330990.1	HvSIZ1-3H
709- 18:	chr4A	TraesCS4A03G0496400.1	TaSIZ1-4A	Ch5	HORVU.MOREX.r3.5HG0466170.1	HvSIZ1-5H
751- 10:	chr4A	TraesCS4A03G0496400.1	TaSIZ1-4A	Ch4	HORVU.MOREX.r3.4HG0355130.1	HvSIZ1-4H
824- 32:	chr4B	TraesCS4B03G0317200.1	TaSIZ1-4B	Ch4	HORVU.MOREX.r3.4HG0355130.1	HvSIZ1-4H
842- 1:	chr4D	TraesCS4D03G0260100.2	TaSIZ1-4D	Ch4	HORVU.MOREX.r3.4HG0355130.1	HvSIZ1-4H
879- 51:	chr5D	TraesCS4D03G0260100.2	TaSIZ1-4D	Ch4	HORVU.MOREX.r3.4HG0355130.1	HvSIZ1-4H
897- 1:	chr5A	TraesCS5A03G0424800.1	TaSIZ1-5A	Ch4	HORVU.MOREX.r3.4HG0355130.1	HvSIZ1-4H
921- 7:	chr5B	TraesCS5B03G0419700.1	TaSIZ1-5B	Ch4	HORVU.MOREX.r3.4HG0355130.1	HvSIZ1-4H
936-110:	chr4B	TraesCS4B03G0317200.1	TaSIZ1-4B	Ch5	HORVU.MOREX.r3.5HG0466170.1	HvSIZ1-5H
995- 7:	chr4D	TraesCS4D03G0260100.2	TaSIZ1-4D	Ch5	HORVU.MOREX.r3.5HG0466170.1	HvSIZ1-5H
1007-115:	chr5D	TraesCS4D03G0260100.2	TaSIZ1-4D	Ch5	HORVU.MOREX.r3.5HG0466170.1	HvSIZ1-5H
1063- 7:	chr5A	TraesCS5A03G0424800.1	TaSIZ1-5A	Ch5	HORVU.MOREX.r3.5HG0466170.1	HvSIZ1-5H
1080- 38:	chr5B	TraesCS5B03G0419700.1	TaSIZ1-5B	Ch5	HORVU.MOREX.r3.5HG0466170.1	HvSIZ1-5H
1347-130:	chr7A	TraesCS7A03G0299000.2	TaSIZ1-7A	Ch7	HORVU.MOREX.r3.7HG0655510.1	HvSIZ1-7H
1420- 79:	chr7B	TraesCS7B03G0070400.3	TaSIZ1-7B	Ch7	HORVU.MOREX.r3.7HG0655510.1	HvSIZ1-7H
1476-179:	chr7D	TraesCS7D03G0280600.2	TaSIZ1-7D	Ch7	HORVU.MOREX.r3.7HG0655510.1	HvSIZ1-7H
Wheat-Rice
1061- 12:	chr1A	TraesCS1A03G0162100.2	TaSIZ1-1A	Chr5	Os05t0125000-01	OsSIZ1a
1081- 10:	chr1B	TraesCS1B03G0213800.6	TaSIZ1-1B	Chr5	Os05t0125000-01	OsSIZ1a
1100- 10:	chr1D	TraesCS1D03G0150100.8	TaSIZ1-1D	Chr5	Os05t0125000-01	OsSIZ1a
1292- 57:	chr7A	TraesCS7A03G0299000.2	TaSIZ1-7A	Chr6	Os06t0164000-01	OsSIZ1c
1323- 46:	chr7B	TraesCS7B03G0070400.3	TaSIZ1-7B	Chr6	Os06t0164000-01	OsSIZ1c
1350- 63:	chr7D	TraesCS7D03G0280600.2	TaSIZ1-7D	Chr6	Os06t0164000-01	OsSIZ1c
Wheat-Maize
1565- 13:	chr1A	TraesCS1A03G0162100.2	TaSIZ1-1A	Ch6	Zm00001eb265410_T004	ZmSIZ1b
1954- 34:	chr1A	TraesCS1A03G0162100.2	TaSIZ1-1A	Ch8	Zm00001eb355110_T001	ZmSIZ1c
1590- 14:	chr1B	TraesCS1B03G0213800.6	TaSIZ1-1B	Ch6	Zm00001eb265410_T004	ZmSIZ1b
1995- 23:	chr1B	TraesCS1B03G0213800.6	TaSIZ1-1B	Ch8	Zm00001eb355110_T001	ZmSIZ1c
1618- 14:	chr1D	TraesCS1D03G0150100.8	TaSIZ1-1D	Ch6	Zm00001eb265410_T004	ZmSIZ1b
2036- 29:	chr1D	TraesCS1D03G0150100.8	TaSIZ1-1D	Ch8	Zm00001eb355110_T001	ZmSIZ1c
926- 0:	chr4A	TraesCS4A03G0496400.1	TaSIZ1-4A	Ch3	Zm00001eb163160_T002	ZmSIZ1a
954- 6:	chr5A	TraesCS5A03G0424800.1	TaSIZ1-5A	Ch3	Zm00001eb163160_T002	ZmSIZ1a
970- 5:	chr5B	TraesCS5B03G0419700.1	TaSIZ1-5B	Ch3	Zm00001eb163160_T002	ZmSIZ1a
986- 6:	chr5D	TraesCS5D03G0393000.1	TaSIZ1-5D	Ch3	Zm00001eb163160_T002	ZmSIZ1a
2338-140:	chr7A	TraesCS7A03G0299000.2	TaSIZ1-7A	Ch9	Zm00001eb375680_T002	ZmSIZ1d
2368-178:	chr7B	TraesCS7B03G0070400.3	TaSIZ1-7B	Ch9	Zm00001eb375680_T002	ZmSIZ1d
2387-174:	chr7D	TraesCS7D03G0280600.2	TaSIZ1-7D	Ch9	Zm00001eb375680_T002	ZmSIZ1d
Wheat-Sorghum
468- 12:	chr1A	TraesCS1A03G0162100.2	TaSIZ1-1A	Ch6	KXG21178	SbSIZ1c
1374- 33:	chr1A	TraesCS1A03G0162100.2	TaSIZ1-1A	Ch8	KXG22754	SbSIZ1b
1243- 9:	chr4A	TraesCS4A03G0496400.1	TaSIZ1-4A	Ch3	KXG22754	SbSIZ1b
1335- 10:	chr5A	TraesCS5A03G0424800.1	TaSIZ1-5A	Ch3	QU82677	SbSIZ1a
1339- 7:	chr5B	TraesCS5B03G0419700.1	TaSIZ1-5B	Ch3	QU82677	SbSIZ1a
1343- 11:	chr5D	TraesCS5D03G0393000.1	TaSIZ1-5D	Ch3	QU82677	SbSIZ1a
392- 45:	chr7B	TraesCS7B03G0070400.3	TaSIZ1-7B	Ch9	KXG19385	SbSIZ1d

[truncated: 5 more sheets: Table S11, Table S12, Table S13, Table S14, Table S15]
